# Supplementary material for: New cyclometalated Ir(iii) complexes with bulky ligands with potential applications in LEC devices: experimental and theoretical studies of their photophysical properties
Source: Royal Society of Chemistry journal article supplement (doi:10.1039/c6nj00213g), 2016-01-01

## Supplementary Information

### **New cyclometalated Ir(III) complexes with bulky ligands with potential applications in LEC devices. Experimental and theoretical studies of their photophysical properties**

Paulina Dreyse<sup>a,\*</sup>, Iván González<sup>b</sup>, Diego Cortés-Arriagada<sup>b</sup>, Oscar Ramírez<sup>b</sup>, Ignacio Salas<sup>a,c</sup>,  
Andrea González<sup>a,c</sup>, Alejandro Toro-Labbe<sup>b</sup>, Bárbara Loeb<sup>b</sup>

<sup>b</sup>Departamento de Química, Universidad Técnica Federico Santa María, Avenida España 1680, Valparaíso, Chile. E-mail: [paulina.dreyse@usm.cl](mailto:paulina.dreyse@usm.cl)

<sup>b</sup>Facultad de Química, Pontificia Universidad Católica de Chile, Avenida Vicuña Mackenna 4860, Macul, Santiago, Chile. E-mail: [ilgonzalez@uc.cl](mailto:ilgonzalez@uc.cl)

<sup>c</sup>Facultad de Ciencias Naturales, Matemáticas y Medio Ambiente, Universidad Tecnológica Metropolitana, Avenida José Pedro Alessandri 1242, Ñuñoa, Santiago.

### <sup>1</sup>H NMR Characterizations

#### **[Ir(F<sub>2</sub>ppy)<sub>2</sub>L1](PF<sub>6</sub>) complex.**

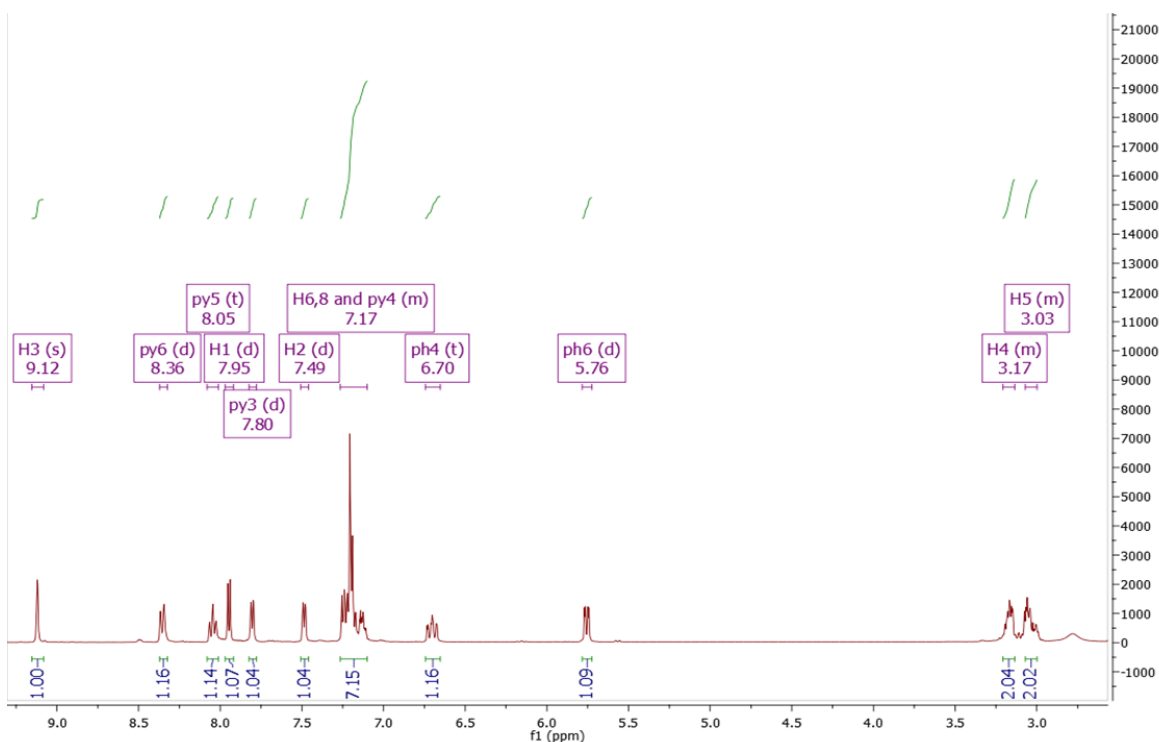

**Figure S1.** <sup>1</sup>H-NMR spectrum of [Ir(F<sub>2</sub>ppy)<sub>2</sub>L1](PF<sub>6</sub>) complex (400 MHz, CO(CD<sub>3</sub>)<sub>2</sub>).

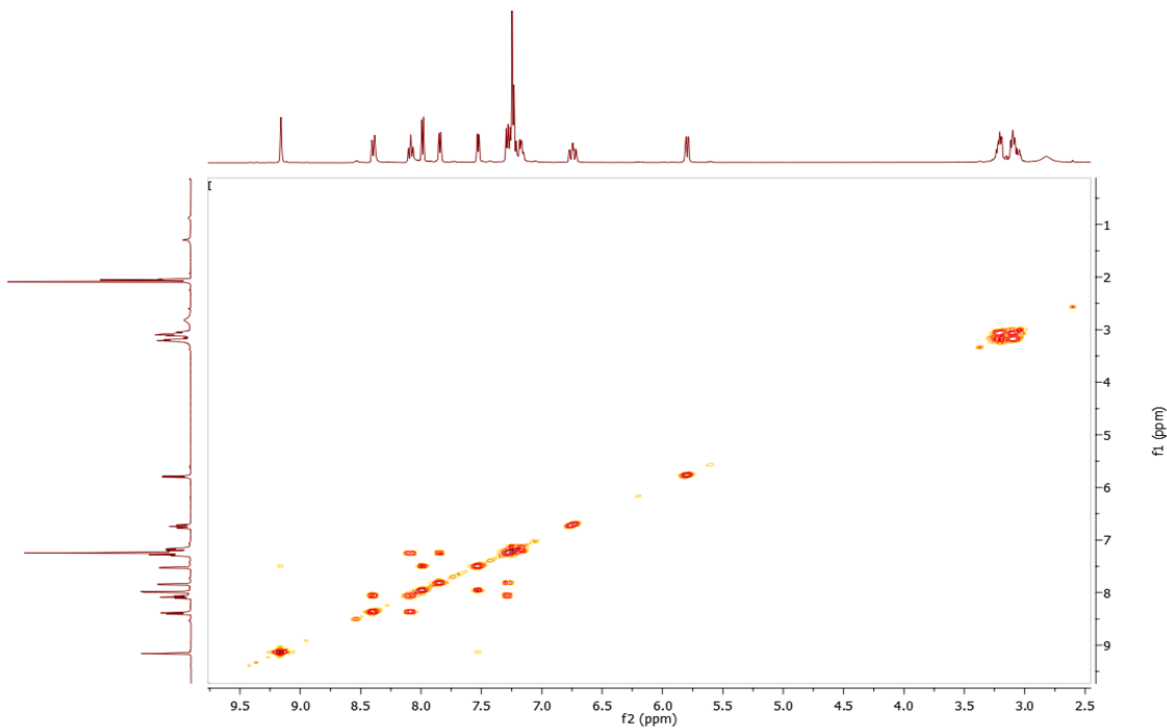

Figure S2. 2D-NMR spectrum of  $[\text{Ir}(\text{F}_2\text{ppy})_2\text{L1}](\text{PF}_6)$  complex (400 MHz,  $\text{CO}(\text{CD}_3)_2$ ).

**$[\text{Ir}(\text{F}_2\text{ppy})_2\text{L2}](\text{PF}_6)$  complex.**

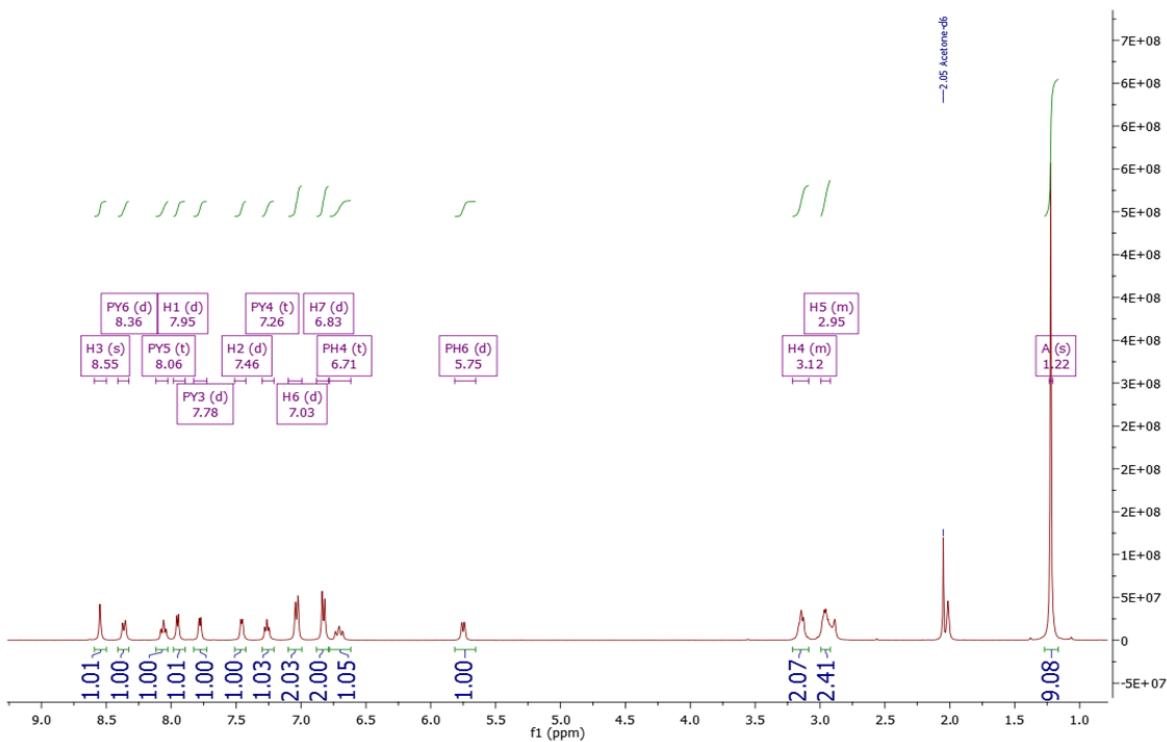

Figure S3.  $^1\text{H}$ -NMR spectrum of  $[\text{Ir}(\text{F}_2\text{ppy})_2\text{L2}](\text{PF}_6)$  complex (400 MHz,  $\text{CO}(\text{CD}_3)_2$ ).

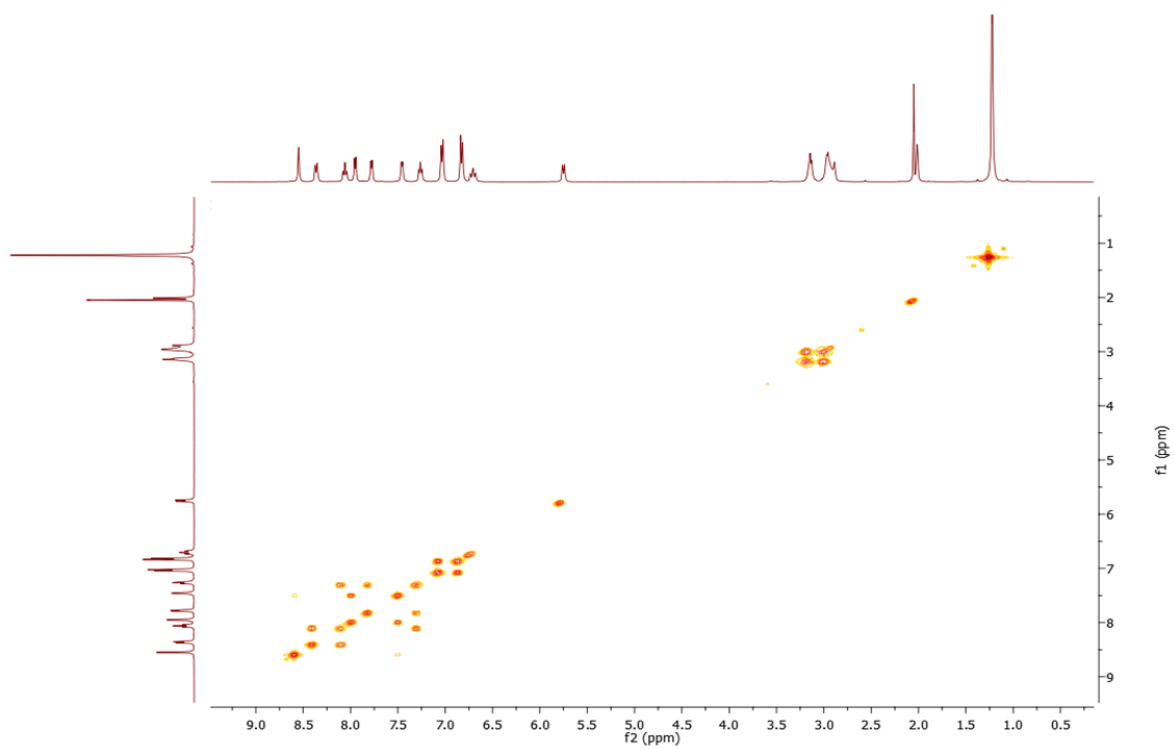

**Figure S4.** 2D-NMR spectrum of  $[\text{Ir}(\text{F}_2\text{ppy})_2\text{L}_2](\text{PF}_6)$  complex (400 MHz,  $\text{CO}(\text{CD}_3)_2$ ).

## Mass Spectroscopy Characterizations

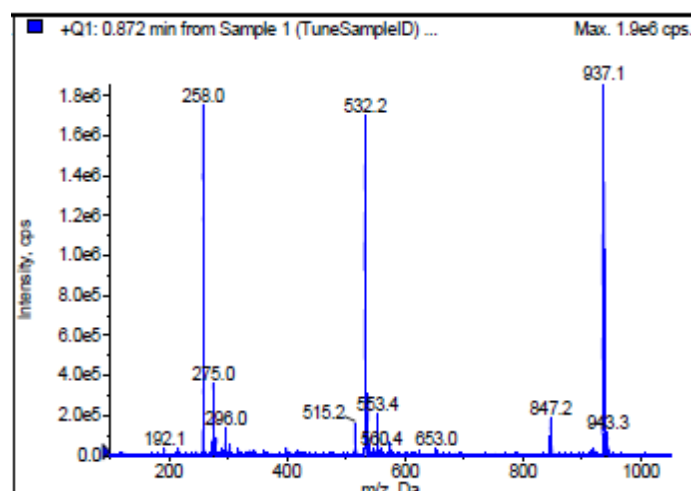

*Figure S5. Mass spectrum of  $[\text{Ir}(\text{F}_2\text{ppy})_2\text{L1}](\text{PF}_6)$  complex from acetonitrile solution.*

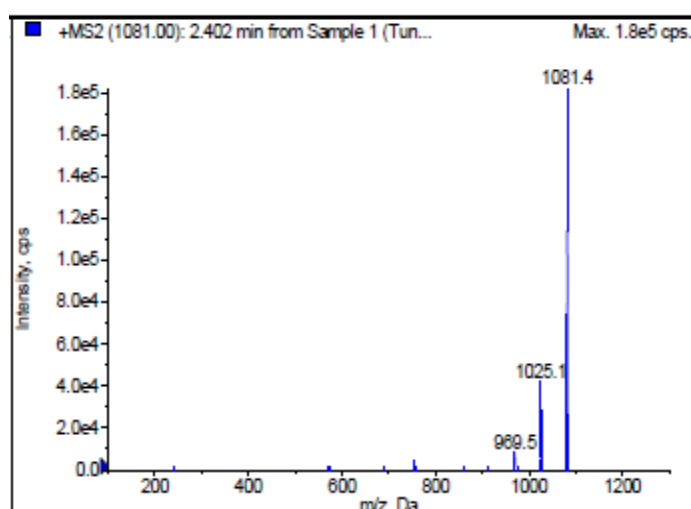

*Figure S6. Mass spectrum of  $[\text{Ir}(\text{F}_2\text{ppy})_2\text{L2}](\text{PF}_6)$  complex from acetonitrile solution.*

## Theoretical Calculations - Frontier molecular orbitals

**Table S1.** Orbital compositions of selected frontier molecular orbitals in complexes  $[\text{Ir}(\text{F}_2\text{ppy})_2\text{L1}]^+$  and  $[\text{Ir}(\text{F}_2\text{ppy})_2\text{L2}]^+$ .

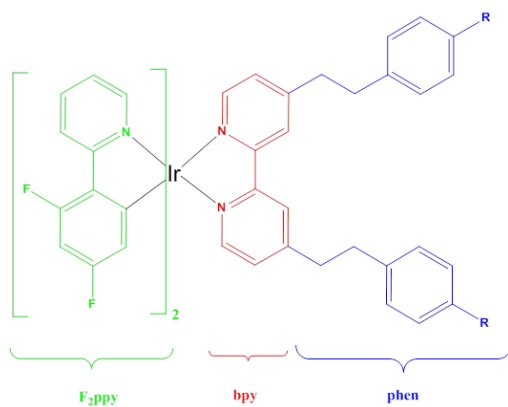

| $[\text{Ir}(\text{F}_2\text{ppy})_2\text{L1}]^+$ | $E$ (eV) | Ir | $(\text{F}_2\text{ppy})_2$ | L1  |      |
|--------------------------------------------------|----------|----|----------------------------|-----|------|
|                                                  |          |    |                            | bpy | phen |
| LUMO+2                                           | -1.76    | 6  | 91                         | 3   | 0    |
| LUMO+1                                           | -1.84    | 5  | 92                         | 3   | 0    |
| LUMO                                             | -2.40    | 3  | 2                          | 90  | 5    |
| HOMO                                             | -5.94    | 46 | 51                         | 3   | 0    |
| HOMO-1                                           | -6.41    | 11 | 87                         | 1   | 1    |
| HOMO-2                                           | -6.52    | 22 | 74                         | 2   | 2    |
| HOMO-3                                           | -6.66    | 21 | 11                         | 6   | 62   |

  

| $[\text{Ir}(\text{F}_2\text{ppy})_2\text{L2}]^+$ | $E$ (eV) | Ir | $(\text{F}_2\text{ppy})_2$ | L2  |      |
|--------------------------------------------------|----------|----|----------------------------|-----|------|
|                                                  |          |    |                            | bpy | phen |
| LUMO+2                                           | -1.76    | 6  | 91                         | 3   | 0    |
| LUMO+1                                           | -1.83    | 5  | 92                         | 3   | 0    |
| LUMO                                             | -2.38    | 3  | 2                          | 90  | 5    |
| HOMO                                             | -5.84    | 0  | 0                          | 2   | 98   |
| HOMO-1                                           | -5.84    | 0  | 0                          | 3   | 97   |
| HOMO-2                                           | -5.94    | 46 | 51                         | 3   | 0    |
| HOMO-3                                           | -6.41    | 11 | 88                         | 1   | 0    |

## Theoretical Calculations – Optimized structures in triplet excited state

**Table S2.** Selected bond distances (Å) and angles (°) of complexes  $[\text{Ir}(\text{F}_2\text{ppy})_2\text{L1}]^+$  and  $[\text{Ir}(\text{F}_2\text{ppy})_2\text{L2}]^+$  in triplet excited states ( $T_2$  and  $T_3$ ).  $T_3$  state for the  $[\text{Ir}(\text{F}_2\text{ppy})_2\text{L1}]^+$  was not obtained due to convergence problems.

| Parameter                                | $[\text{Ir}(\text{F}_2\text{ppy})_2\text{L1}]^+$ | $[\text{Ir}(\text{F}_2\text{ppy})_2\text{L2}]^+$ |        |
|------------------------------------------|--------------------------------------------------|--------------------------------------------------|--------|
|                                          | T2                                               | T2                                               | T3     |
| $d_{\text{Ir-N}_{\text{bpy}}}$           | 2.22                                             | 2.22                                             | 2.21   |
| $d_{\text{Ir-N}_{\text{F}_2\text{ppy}}}$ | 2.07                                             | 2.07                                             | 2.07   |
| $d_{\text{Ir-C}_{\text{F}_2\text{ppy}}}$ | 2.00                                             | 2.00                                             | 2.01   |
| $d(\text{C5-C6})_{\text{bpy}}$           | 1.48                                             | 1.48                                             | 1.48   |
| $d(\text{N3-C5})_{\text{bpy}}$           | 1.36                                             | 1.36                                             | 1.36   |
| $d(\text{C3-C4})_{\text{F}_2\text{ppy}}$ | 1.43                                             | 1.43                                             | 1.43   |
| $\angle \text{C1-Ir-C2}$                 | 90.77                                            | 90.76                                            | 89.39  |
| $\angle \text{C1-Ir-N1}$                 | 80.91                                            | 80.91                                            | 80.74  |
| $\angle \text{C2-Ir-N1}$                 | 95.38                                            | 95.40                                            | 95.49  |
| $\angle \text{N1-Ir-N2}$                 | 174.75                                           | 174.78                                           | 174.74 |
| $\angle \text{C1-Ir-N3}$                 | 97.50                                            | 97.50                                            | 97.86  |
| $\angle \text{C2-Ir-N3}$                 | 171.60                                           | 171.59                                           | 172.52 |
| $\angle \text{N1-Ir-N3}$                 | 87.47                                            | 87.52                                            | 87.53  |
| $\angle \text{N2-Ir-N3}$                 | 96.73                                            | 96.65                                            | 96.66  |
| $\angle \text{N3-Ir-N4}$                 | 74.28                                            | 74.30                                            | 74.96  |

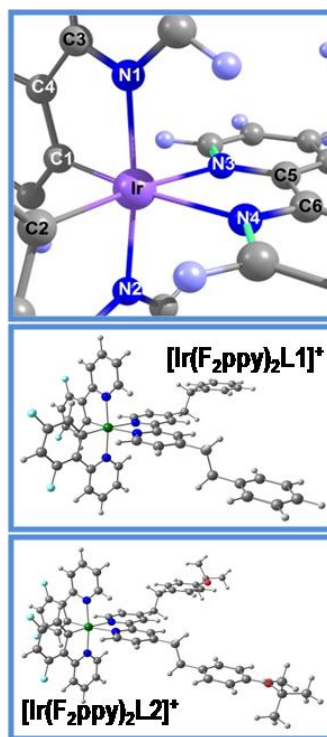

Supplement: c6nj00213g1.pdf [file c6nj00213g1.pdf]
